# Supplementary material for: A 3D chiral nanoporous coordination framework consisting of homochiral nanotubes assembled from octuple helices
Source: Royal Society of Chemistry journal article supplement (doi:10.1039/b711405b), 2007-01-01
Supplement: b711405b.pdf [file b711405b.pdf]

## Supporting Information

### **A 3D Chiral Nanoporous Coordination Framework Consisting of Homochiral Nanotubes Assembled from Octuple Helices**

Xiang-Rong Hao, Xin-Long Wang, Chao Qin, Zhong-Min Su\*, En-Bo Wang\*,

Ya-Qian Lan, and Kui-Zhan Shao

*Institute of Functional Materials, Department of Chemistry and Key Laboratory of  
Polyoxometalates Science of Ministry of Education, College of Chemistry, Northeast  
Normal University, Changchun 130024, China. Email: [zmsu@nenu.edu.cn](mailto:zmsu@nenu.edu.cn)  
[wangenbo@public.cc.jl.cn](mailto:wangenbo@public.cc.jl.cn)*

**X-ray structure analysis:**  $C_{31}H_{38}N_3O_8Cd$ :  $M_r = 693.04$ , hexagonal, space group  $P6_122$ ,  $a = b = 26.712(4)$  Å,  $c = 15.919(3)$  Å,  $\alpha = \beta = 90^\circ$ ,  $\gamma = 120^\circ$ ,  $V = 9837(3)$  Å<sup>3</sup>,  $Z = 12$ ,  $\rho_{\text{calcd}} = 1.404$  mg m<sup>-3</sup>, Flack parameter =  $-0.01(3)$ , final  $R1 = 0.0384$  for 9677 independent reflections [ $I > 2\sigma(I)$ ]. The data were collected on a Bruker Apex CCD diffractometer at 133(2) K with graphite-monochromated  $Mo_{K\alpha}$  radiation ( $\lambda = 0.71073$ Å).

The data were collected on a Bruker Apex CCD diffractometer at 133(2) K with graphite-monochromated  $Mo_{K\alpha}$  radiation ( $\lambda = 0.71073$ Å). The structures were solved by direct method and refined by full-matrix least-squares methods with SHELXL.<sup>[1]</sup> The anion and DMA molecules were highly disordered and could not be modeled properly, thus the SQUEEZE routine, a part of the PLATON package of crystallographic software, was applied to calculate the solvent disorder area and remove its contribution to the overall intensity data. The refinements of the guest-free structure on the squeezed data gave the final  $R1 = 0.0384$  and  $wR2 = 0.0798$  ( $R1 = 0.0463$  and  $wR2 = 0.1322$  without employing PLATON/SQUEEZE). The final formula was calculated from the SQUEEZE results combined with the following characterization techniques. Despite the disorder, identification of the guest molecules is readily accomplished by <sup>1</sup>H NMR spectroscopy. The <sup>1</sup>H NMR spectrum of **1** recorded in D<sub>2</sub>O exhibits a set of well-resolved proton signals. The signals at 2.88, 2.73 and 1.91 ppm attributed to three CH<sub>3</sub> groups of DMA,<sup>[2]</sup> while the signal at 2.54 ppm ascribes to the CH<sub>3</sub> group of dimethylamine. Furthermore, NMR analysis reveals that the relative molar ratio of dimethylamine and DMA is approximately 1:2. The IR

spectrum of **1**, as expected, exhibits a sharp band at  $1619\text{ cm}^{-1}$  corresponding to  $\tilde{\nu}_{\text{C=O}}$  stretching frequency, which is indicative of DMA molecule. According to the previous literature, the peaks of  $1540$  and  $1398\text{ cm}^{-1}$  are attributed to the asymmetric and symmetric stretching vibrations of the carboxylate group of bpdc ligand.<sup>[3]</sup> The peak at ca.  $3419\text{ cm}^{-1}$  is attributed to the N-H absorption vibration of dimethylamine. Further information supporting the formula of **1** is obtained by thermogravimetric analysis, elemental analysis and the consideration of charge balance.

[1] G. M. Sheldrick, SHELXL, Version 5.1. Siemens Industrial Automation, Inc., Madison, WI, 1997.

[2] L. Carlucci, G. Ciani, D. M. Proserpio, F. Porta, *Angew. Chem. Int. Ed.* 2003, **42**, 317.

[3] a) F. A. Almeida Paz, Y. Z. Khimyak, A. D. Bond, J. Rocha, J. Klinowsk, *Eur. J. Inorg. Chem.* 2002, 2823; b) Q. R Fang, X. Shi, G. Wu, G. Tian, G. S. Zhu, R. W. Wang, S. L. Qiu, *J. Solid. State.* 2003, **176**, 1; c) Y. H. Wang, B. Breidenkötter, B. Riegera, D. Volkmer, *Dalton Trans.* 2007, 689.

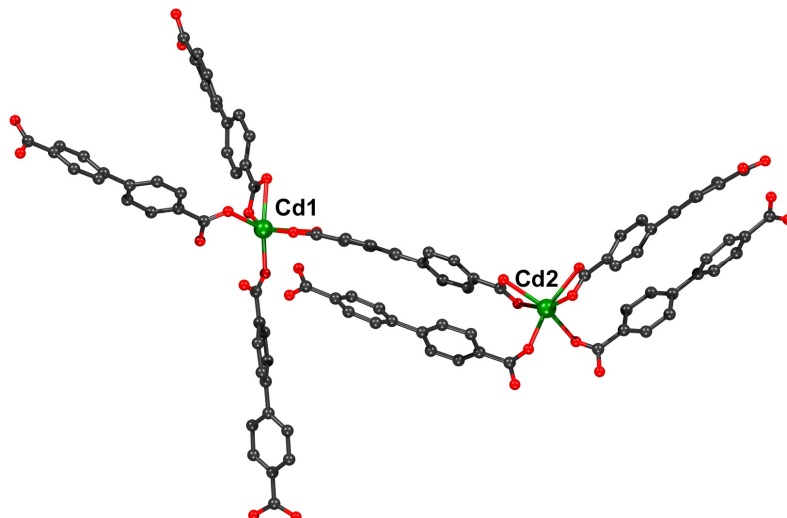

**SI-1.** Section of the X-ray crystal structure of **1**, showing the coordination environments of  $\text{Cd}^{2+}$  ions and their connectivity with bpdc anions. Color code: C black; O red; Cd green.

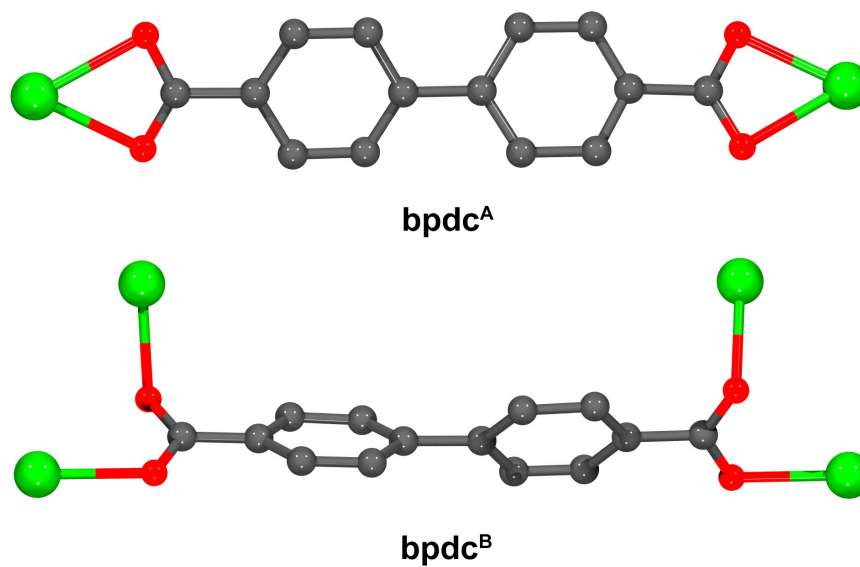

**SI-2.** Coordination modes of the bpdc ligands in the structure of **1**. bpdc<sup>A</sup>: chelating bis(bidentate), bpdc<sup>B</sup>: bridging bis(bidentate). Color code: C black; O red; Cd green.

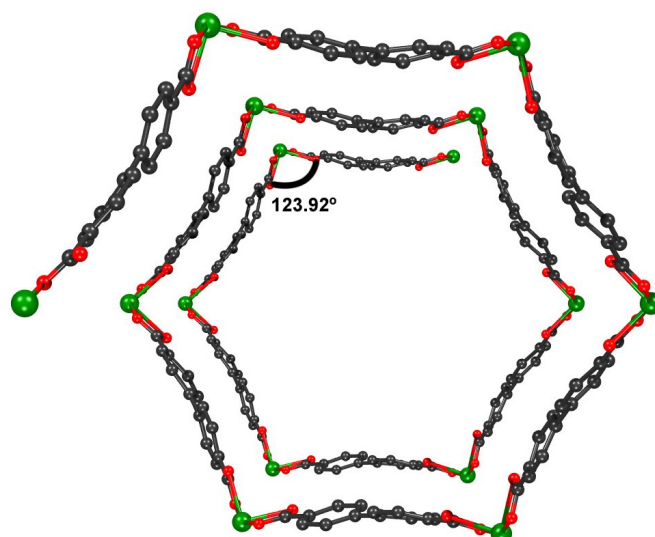

**SI-3.** An angle of  $123.92^\circ$  formed between the planes defined by the two C-O-Cd-O-C chelate rings at one metal center. Color code: C black; O red; Cd green.

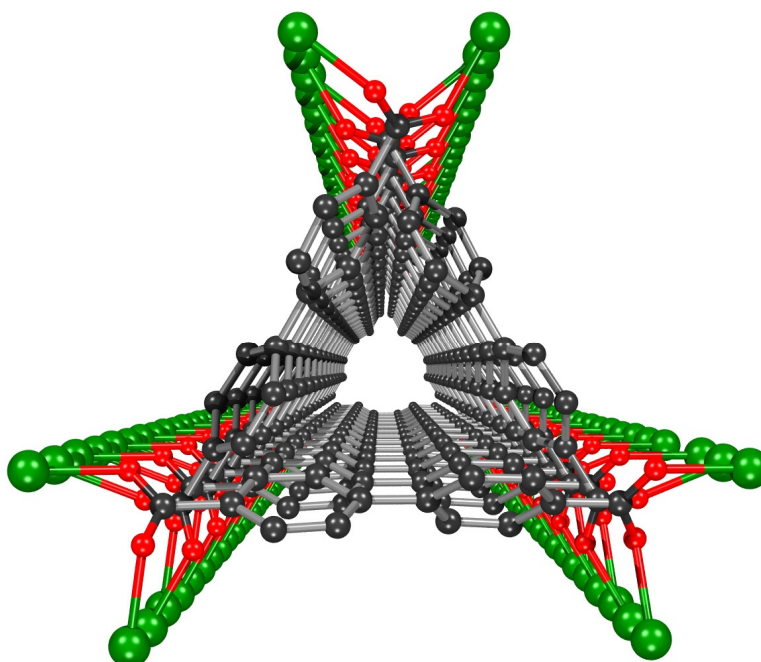

**SI-4.** Perspective view of the trigonal channel that is surrounded by bpdcb<sup>B</sup> ligands. Color code: C black; O red; Cd green.

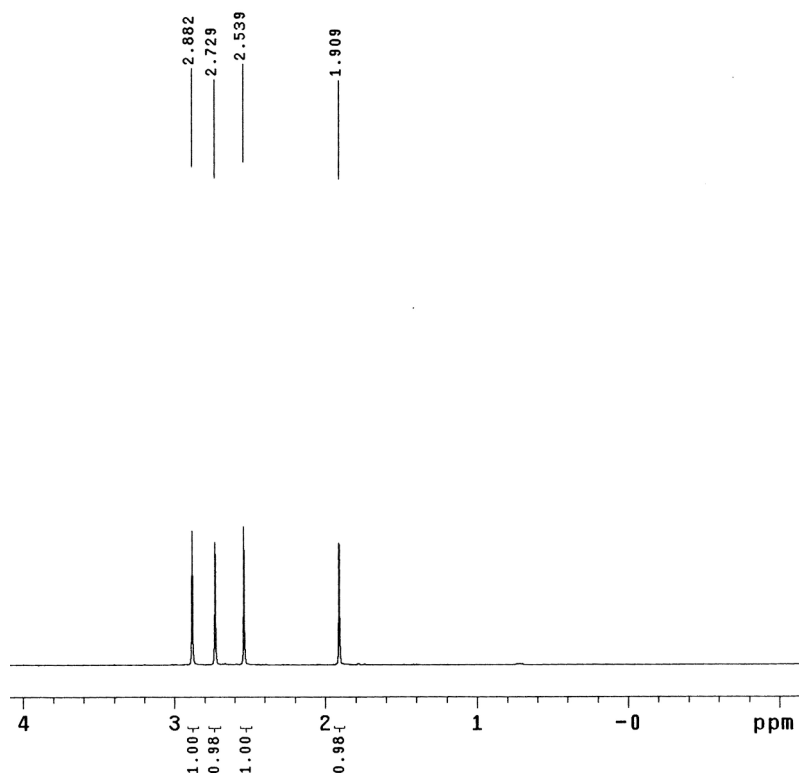

**SI-5.** The  $^1\text{H}$  NMR spectrum of **1** recorded in  $\text{D}_2\text{O}$ .

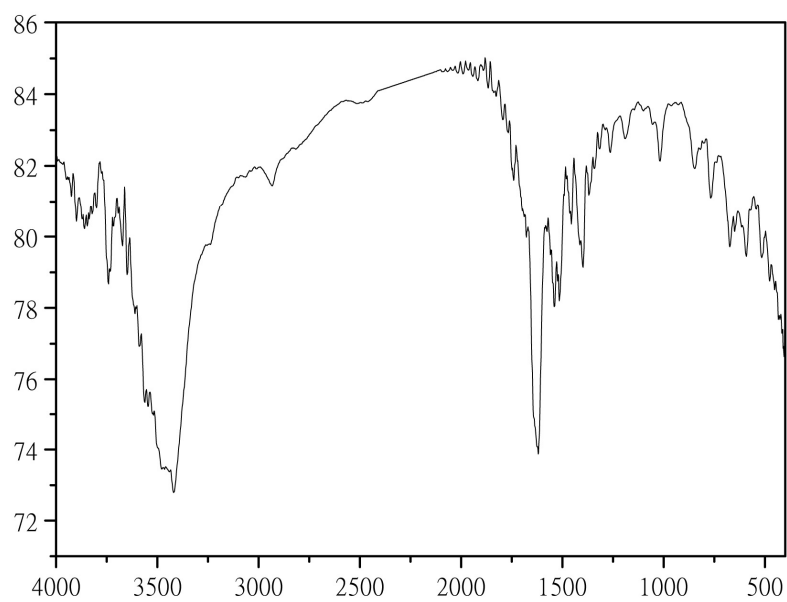

**SI-6.** FT-IR spectrum of as-synthesized **1**.

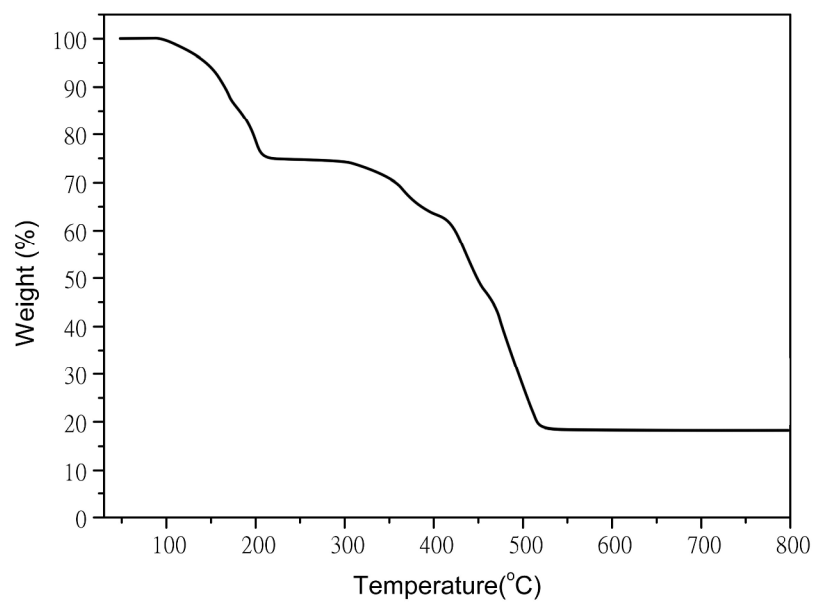

**SI-7. TG curve of 1.**
